# Supplementary material
Source: PubMed Central journal article supplement (PMC8729501)

## Supplementary Material – Table of contents

- Supplemental Figure 1: effect of atrasentan on the doubling of serum creatinine and kidney failure across baseline eGFR and UACR categories
- Supplemental Figure 2: The effect of atrasentan on kidney endpoints across baseline eGFR and UACR categories in the atrasentan responder population.
- Supplemental Figure 3: The effect of atrasentan on heart failure and cardiovascular death across baseline eGFR and UACR categories.
- Supplemental Figure 4: The effect of atrasentan on heart failure, and heart failure and cardiovascular death, across baseline eGFR and UACR categories in the atrasentan responder population.

**Supplemental Figure 1: effect of atrasentan on the doubling of serum creatinine and kidney failure across baseline eGFR and UACR categories.** Figure shows the relative effect and absolute risk difference.

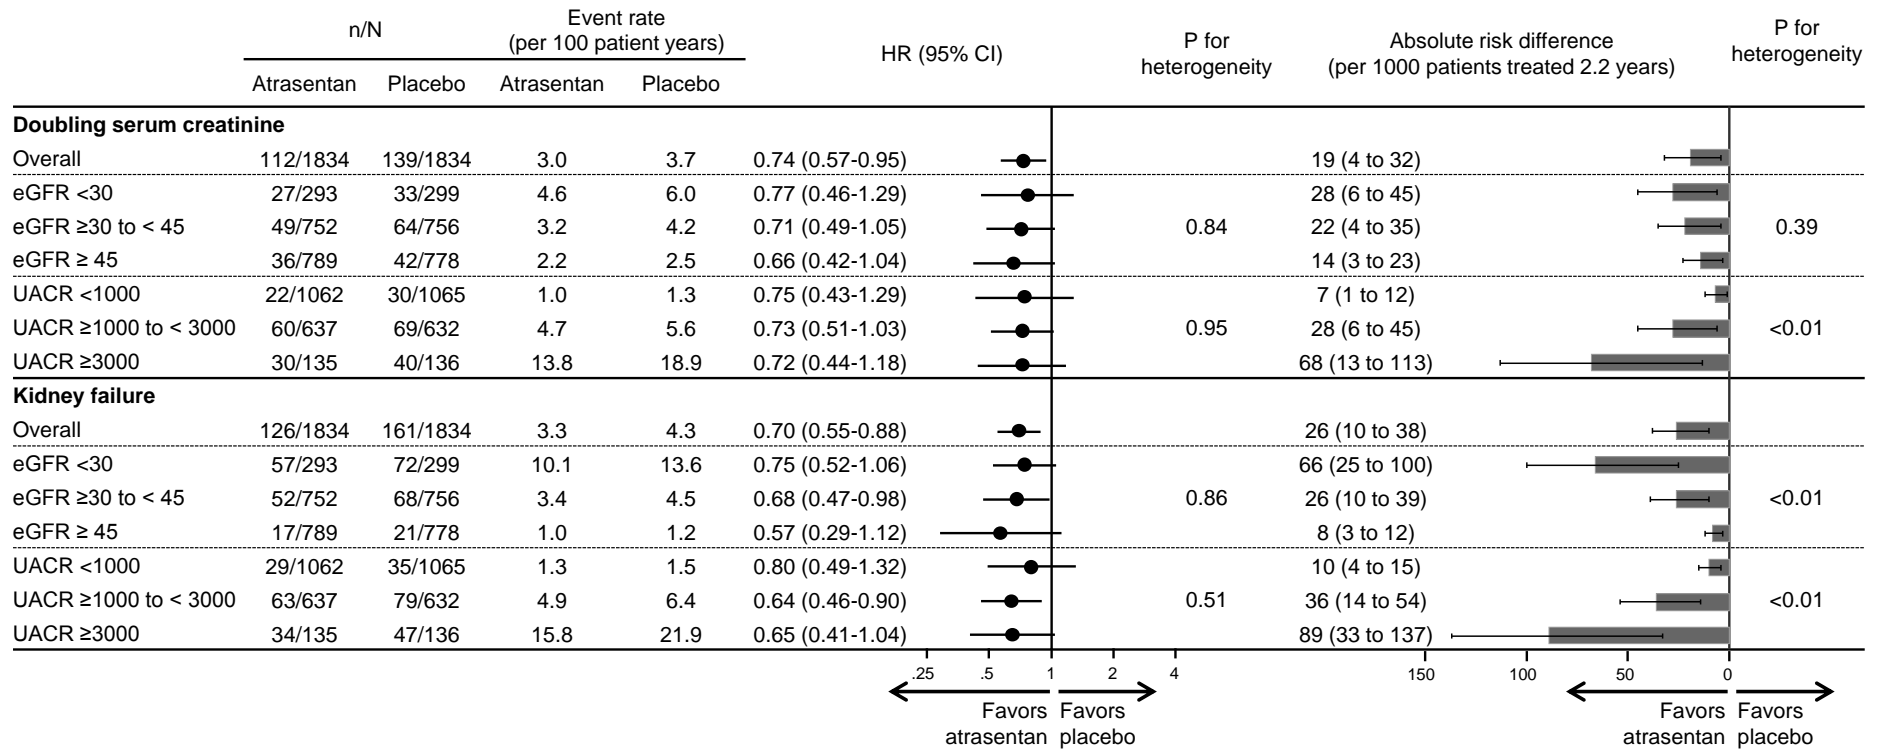

**Supplemental Figure 2: The effect of atrasentan on kidney endpoints across baseline eGFR and UACR categories in the atrasentan responder population. Figure shows the relative effect and absolute risk difference.**

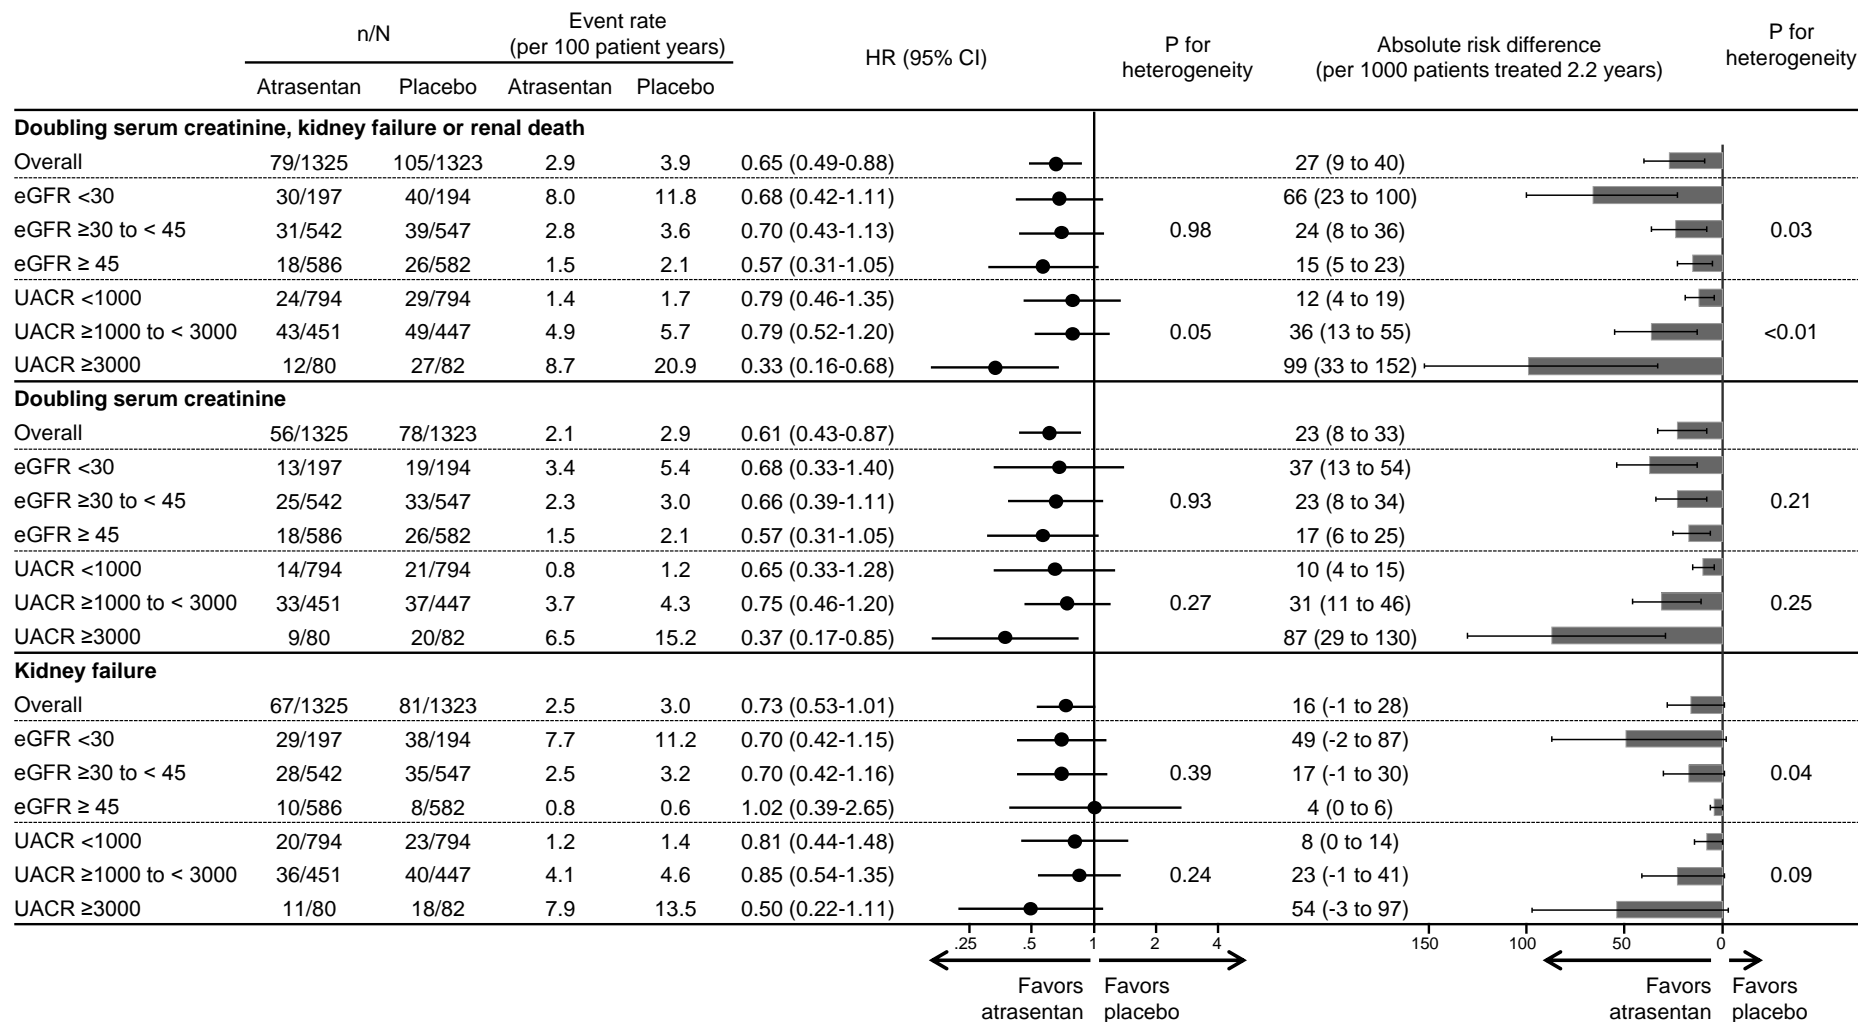

**Supplemental Figure 3: The effect of atrasentan on heart failure and cardiovascular death across baseline eGFR and UACR categories.** Figure shows the relative effect and absolute risk difference

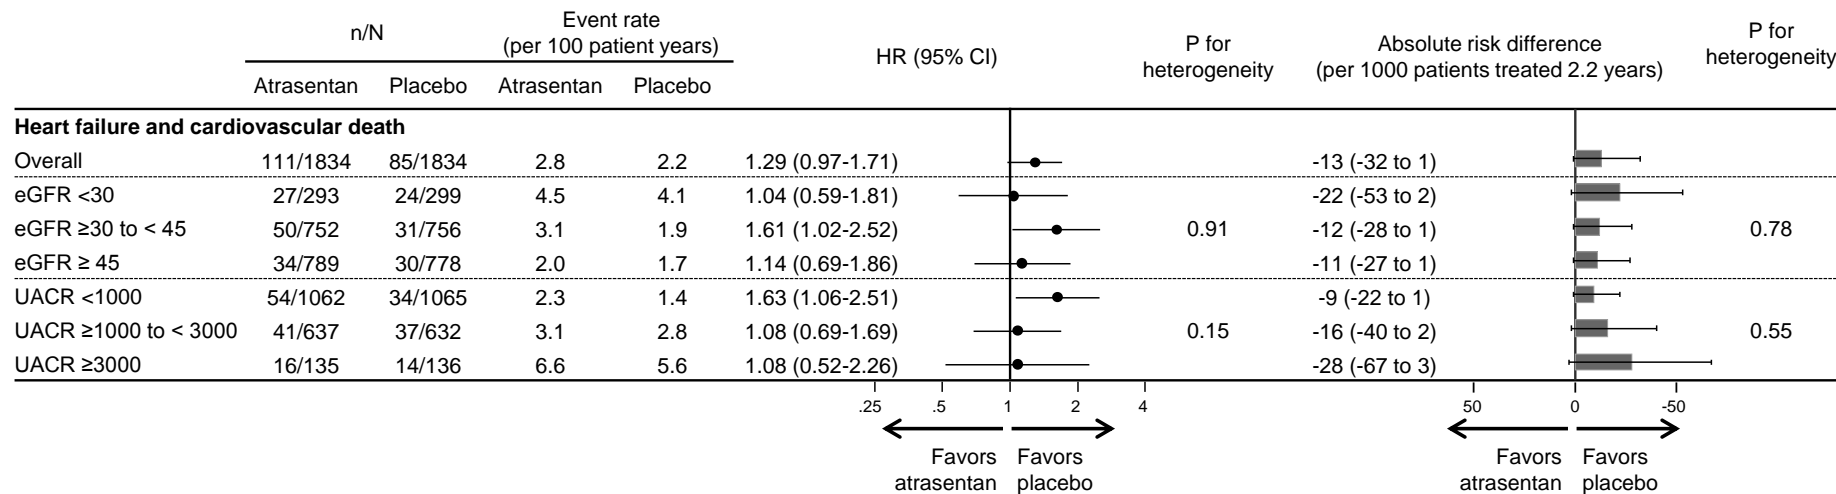

**Supplemental Figure 4: The effect of atrasentan on heart failure, and heart failure and cardiovascular death, across baseline eGFR and UACR categories in the atrasentan responder population.** Figure shows the relative effect and absolute risk difference.

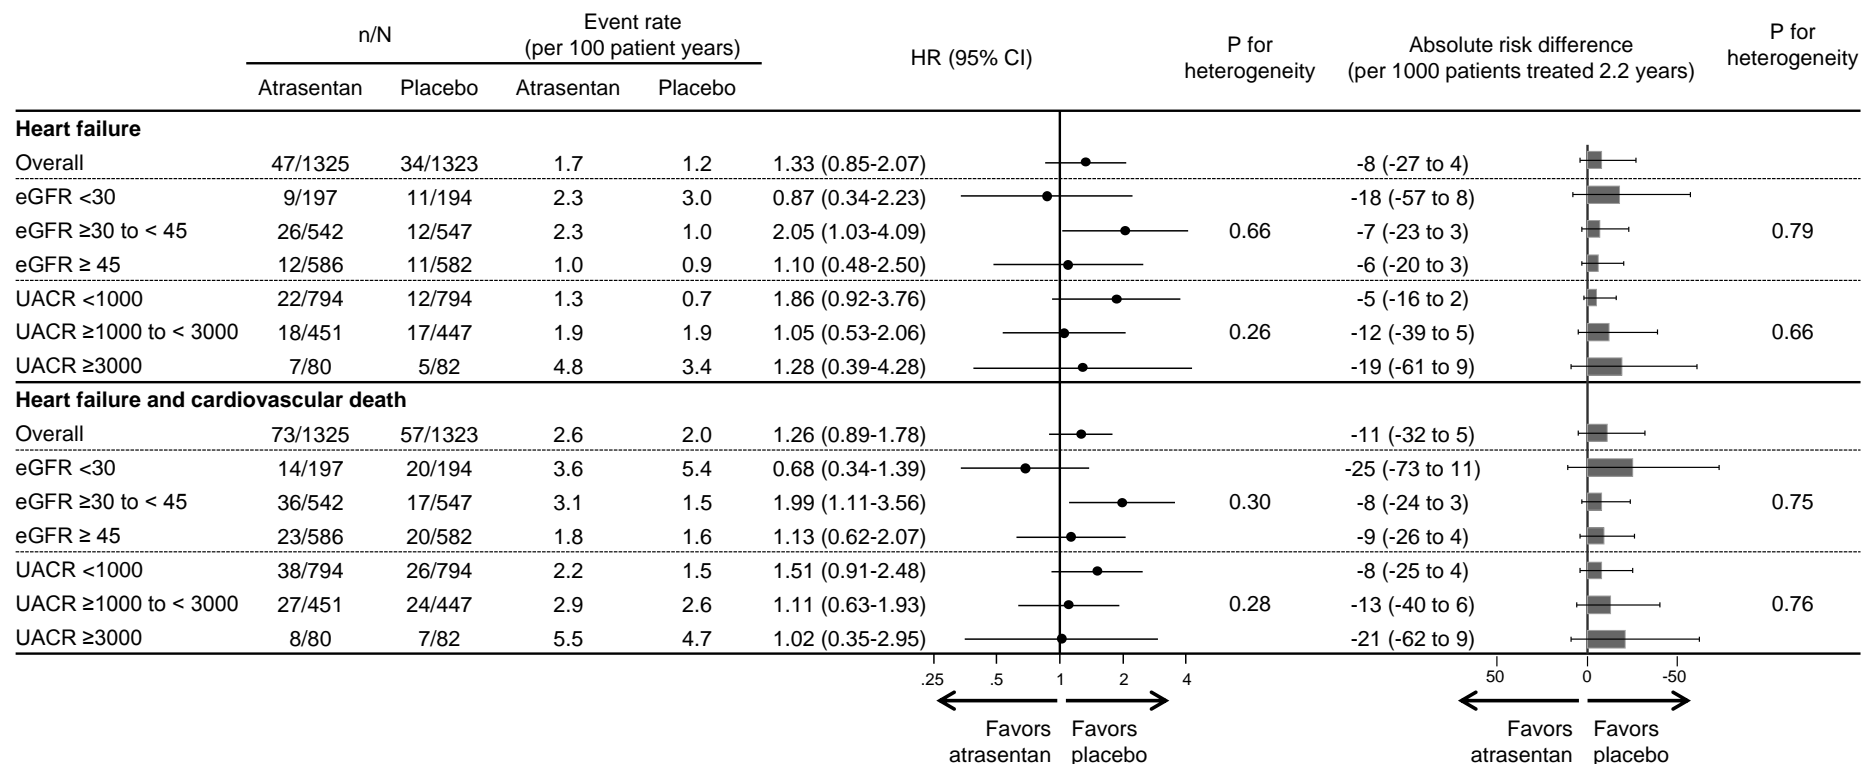

Supplement: CJN.07340521SupplementaryData.pdf [file CJN.07340521SupplementaryData.pdf]
